# Supplementary material
Source: Springer Nature journal article supplement (https://www.springermedizin.de/resource/supplementary/12904_2012_145_MOESM2_ESM.pdf/9517708)

Clinical needs:

- Education
- Psychosocial support
- Clinical assessment
- Communication
- Information

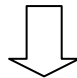

Home telehealth  
service

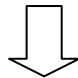

Evaluation- measures may  
include:

- Anxiety
- Quality of life
- Acceptability
- Satisfaction
- Utility
- Costs

Success factors:

- Technology
- Organisational readiness
- Clinician/family acceptance
- Study design
- Economics
- Suitability of intervention

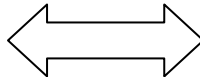

Supplement: MOESM2 [file 9517708]
